# Supplementary material
Source: ML conference proceedings conference paper supplement (https://openaccess.thecvf.com/content/WACV2024/html/Katsumata_Soft_Curriculum_for_WACV_2024_paper.html)
Supplement: Supplementary file 1 [file Katsumata_Soft_Curriculum_for_WACV_2024_supplemental.pdf]

# Soft Curriculum for Learning Conditional GANs with Noisy-Labeled and Uncurated Unlabeled Data: Supplementary Material

Kai Katsumata<sup>1</sup> Duc Minh Vo<sup>1</sup> Tatsuya Harada<sup>1,2</sup> Hideki Nakayama<sup>1</sup>

<sup>1</sup>The University of Tokyo, <sup>2</sup>RIKEN

{katsumata,vmduc,nakayama}@nlab.ci.i.u-tokyo.ac.jp, harada@mi.t.u-tokyo.ac.jp

## A. Details of compared methods.

We provide the training procedure for compared methods. All methods build upon the DiffAug CR-GAN [7] baseline except the experiments of Tab. 6. DiffAug CR-GAN only use labeled samples for training. Other baseline methods have label distribute function  $C$  for unlabeled samples.  $S^3$ GAN [2], OSSGAN [1], and CurriculumGAN have a classifier trained simultaneously. RandomGAN has  $C(x) = e^y$  where  $y$  are sampled from  $\mathcal{Y}$  uniformly. Here,  $e^y$  is the  $y$ -th standard basis vector of  $\mathbb{R}^K$ . SingleGAN has  $C(x) = [1/K, 1/K, \dots, 1/K]^T$ . Semi-supervised baselines assign temporal labels to unlabeled samples using  $C$ . Namely, the labels the discriminator takes are defined as

$$y' = \begin{cases} y & x \text{ is labeled} \\ C(x) & \text{otherwise,} \end{cases} \quad (1)$$

where  $x$  is a sample, and  $y$  is a corresponding label. For extended baselines with re-labeling strategy and CurriculumGAN, the labels for the discriminator are defined as

$$y' = \begin{cases} (y + C(x))/2 & x \text{ is labeled} \\ C(x) & \text{otherwise.} \end{cases} \quad (2)$$

CurriculumGAN assigns the confidence  $c$  to real unlabeled samples in the curriculum learning manner of open-set semi-supervised learning [6] with Otsu-threshold [3]. To achieve the best performance, CurriculumGAN corrects labels of labeled data and applies the curriculum learning to only unlabeled data. In other words, it assigns the high confidence  $c = 1$  to all labeled data.

## B. Additional results

We run additional experiments on TinyImageNet [5] to see the behavior of our method on different numbers of unlabeled samples. We conduct experiments on five configurations: 10%, 30%, 50%, 70%, 100% usage ratios. Other parameters are the same: 150 closed-set classes, 30% label noise, and 20% labeled samples. Our method achieves a

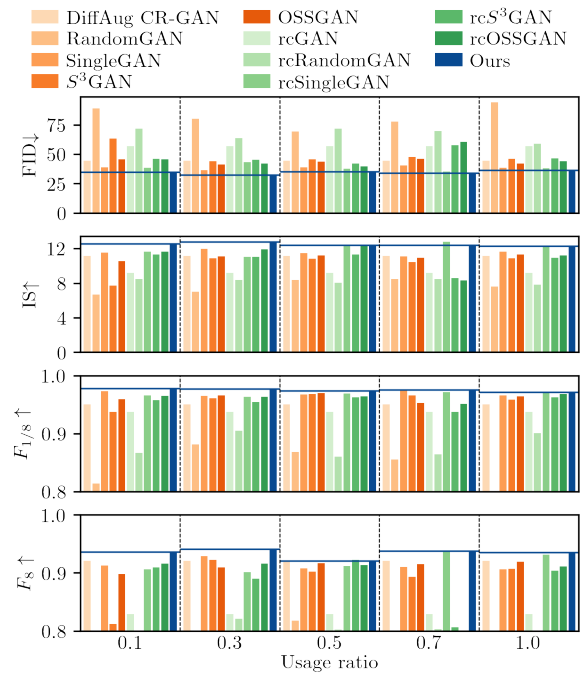

Figure A. Quantitative comparison over different numbers of unlabeled samples. We report the results of the experiments on the TinyImageNet dataset with 150 classes, 20% labeled data, 30% label noise ratio, and usage ratio for unlabeled data of {10%, 30%, 50%, 70%, 100%}. Our method yields better performance stably (blue line).

consistent performance gain on different numbers of unlabeled samples, as shown in Fig. A.

Figure B provide qualitative comparison in the experiments on ImageNet [4] with 200 closed-set classes and 4% labeled data. We can observe the performance gains of our method in terms of both image quality and diversity.

## References

- [1] Kai Katsumata, Duc Minh Vo, and Hideki Nakayama. OSSGAN: open-set semi-supervised image generation. In *CVPR*, pages 11185–11193, 2022. 1

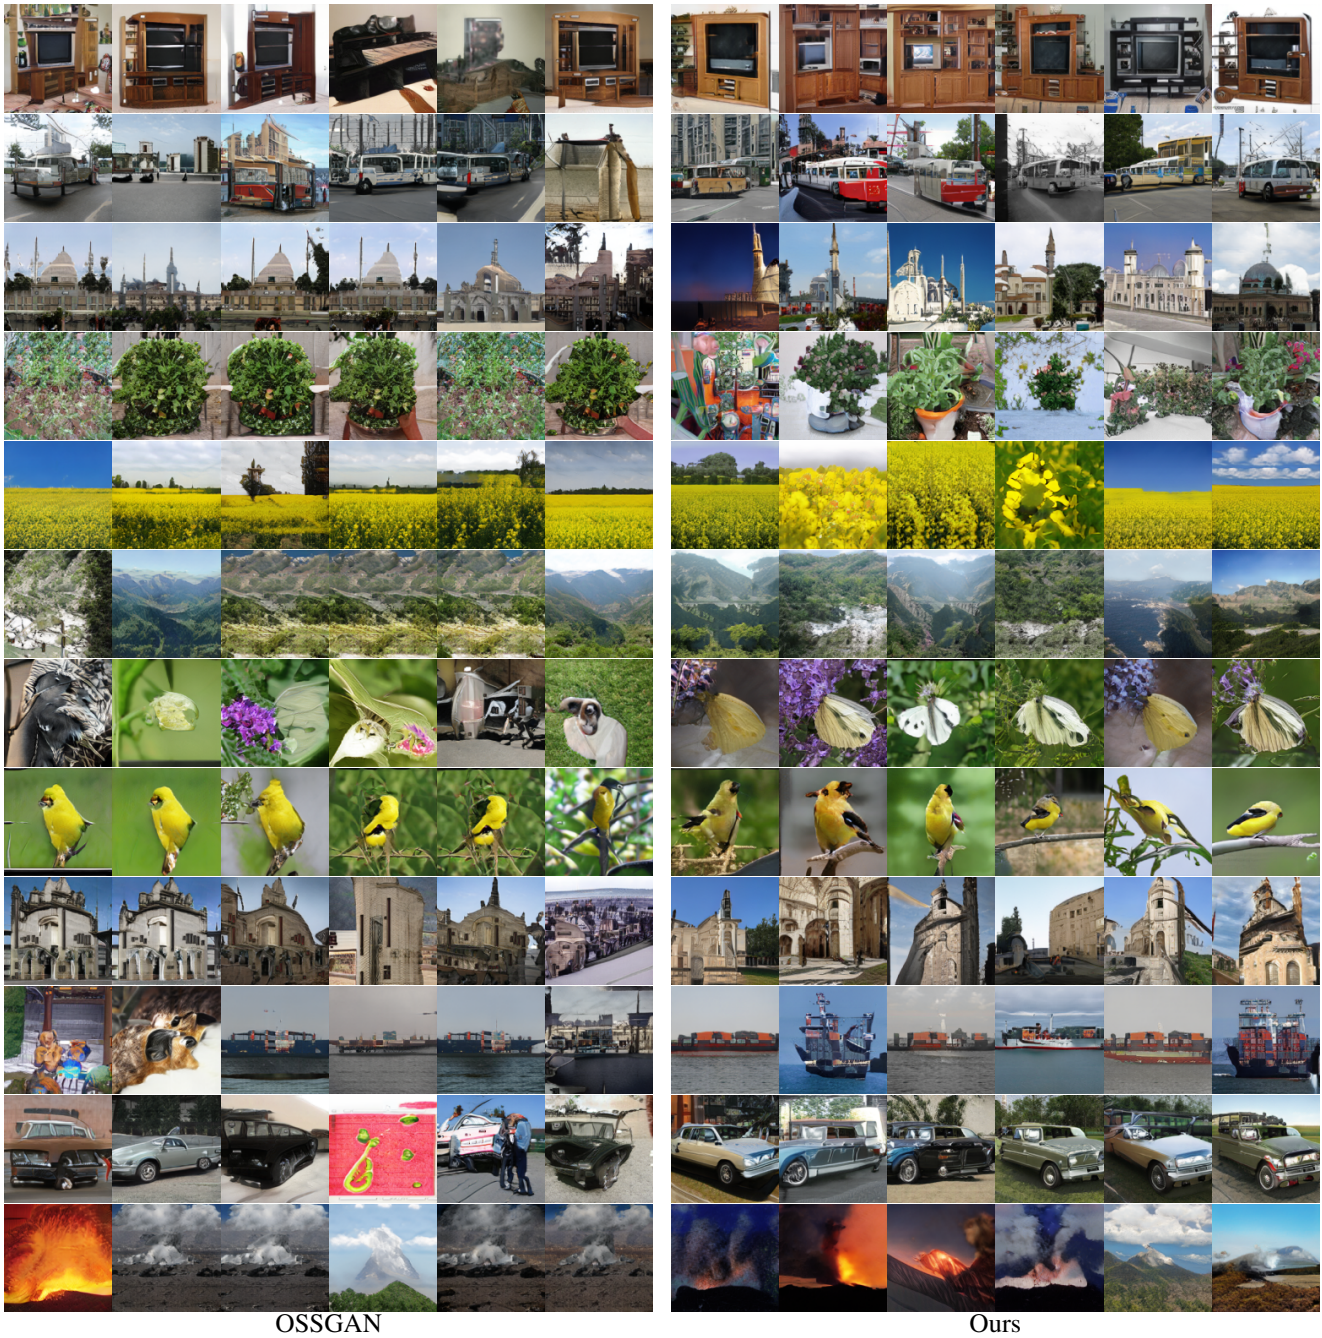

Figure B. Visual comparisons of class-conditional image synthesis results on ImageNet. Our method produces diverse images while respecting the given condition.

- [2] Mario Lučić, Michael Tschannen, Marvin Ritter, Xiaohua Zhai, Olivier Bachem, and Sylvain Gelly. High-fidelity image generation with fewer labels. In *ICML*, pages 4183–4192, 2019. 1
- [3] Nobuyuki Otsu. A threshold selection method from gray-level histograms. *IEEE Transactions on Systems, Man, and Cybernetics*, 9(1):62–66, 1979. 1
- [4] Olga Russakovsky, Jia Deng, Hao Su, Jonathan Krause, Sanjeev Satheesh, Sean Ma, Zhiheng Huang, Andrej Karpathy, Aditya Khosla, Michael Bernstein, Alexander C. Berg, and Li Fei-Fei. ImageNet large scale visual recognition challenge. 1
- [5] Jiayu Wu, Qixiang Zhang, and Guoxi Xu. Tiny ImageNet challenge. 1
- [6] Qing Yu, Daiki Ikami, Go Irie, and Kiyoharu Aizawa. Multi-task curriculum framework for open-set semi-supervised learning. In *ECCV*, pages 438–454, 2020. 1

- [7] Shengyu Zhao, Zhijian Liu, Ji Lin, Jun-Yan Zhu, and Song Han. Differentiable augmentation for data-efficient GAN training. In *NeurIPS*, 2020. 1
